# Supplementary material
Source: Springer Nature journal article supplement (https://www.springermedizin.de/resource/supplementary/40164_2012_27_MOESM2_ESM.pdf/9687044)

**(A)**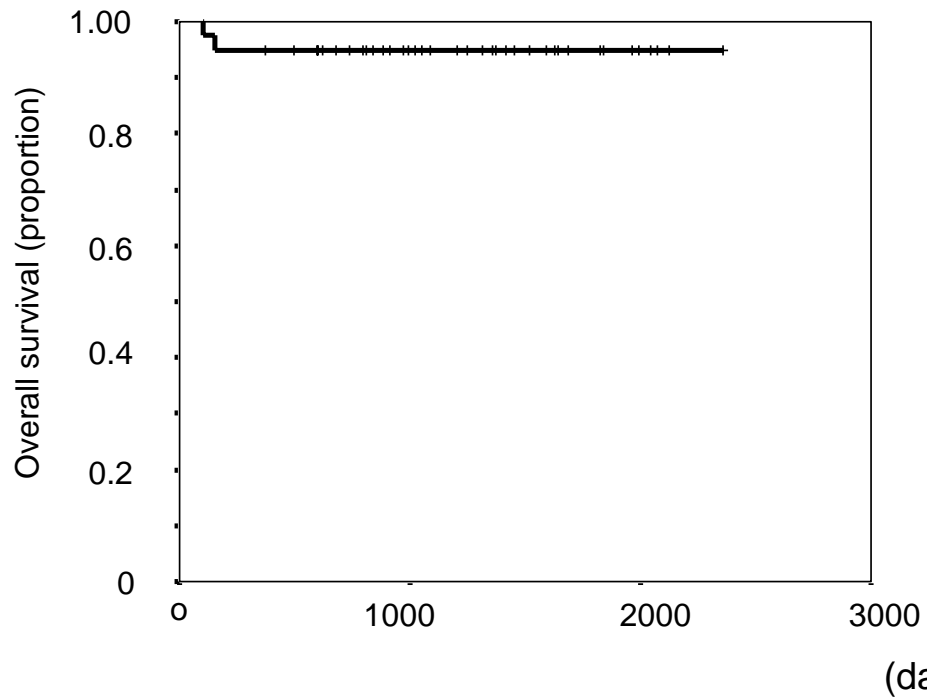**(B)**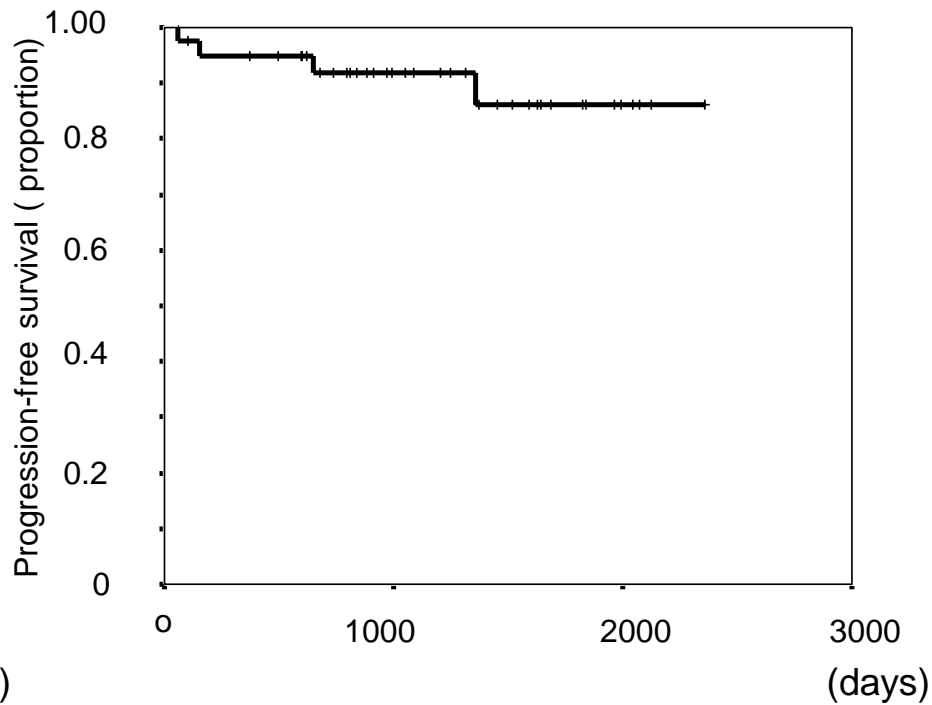

Supplement: MOESM2 [file 9687044]
